# Supplementary material for: Monounsaturated fatty acid-enriched olive oil exacerbates chronic alcohol-induced hepatic steatosis and liver injury in C57BL/6J mice
Source: Royal Society of Chemistry journal article supplement (doi:10.1039/d2fo03323b), 2023-01-01
Supplement: d2fo03323b1.pdf [file d2fo03323b1.pdf]

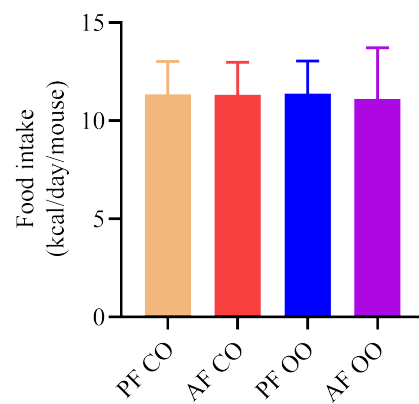

**Fig. S1 Average daily food intakes per mouse among four groups of mice.**

**Figure S2**

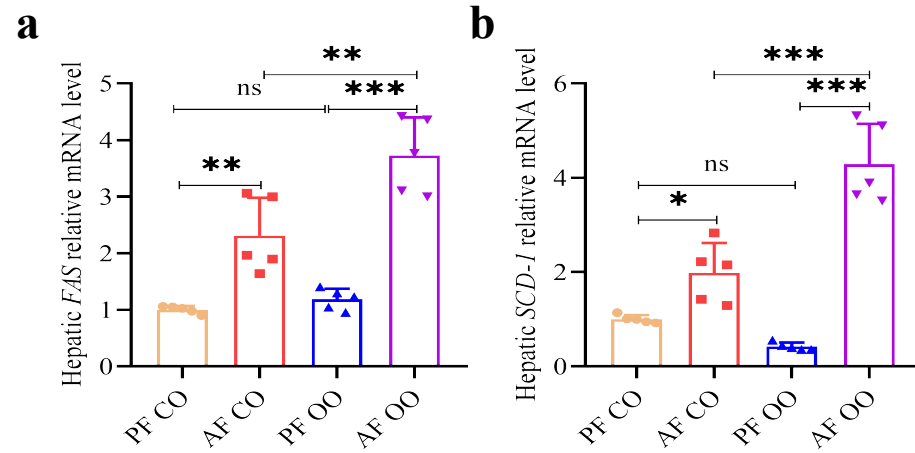

**Fig. S2 Dietary OO disrupts the expressions of hepatic lipid metabolism-related genes at the transcriptional level in alcohol-fed C57BL/6J mice. The mRNA levels of hepatic (a) *FAS* and (b) *SCD-1*.**

\* $p < 0.05$ , \*\* $p < 0.01$ , and \*\*\* $p < 0.001$  indicate statistically significant differences.

**Figure S3**

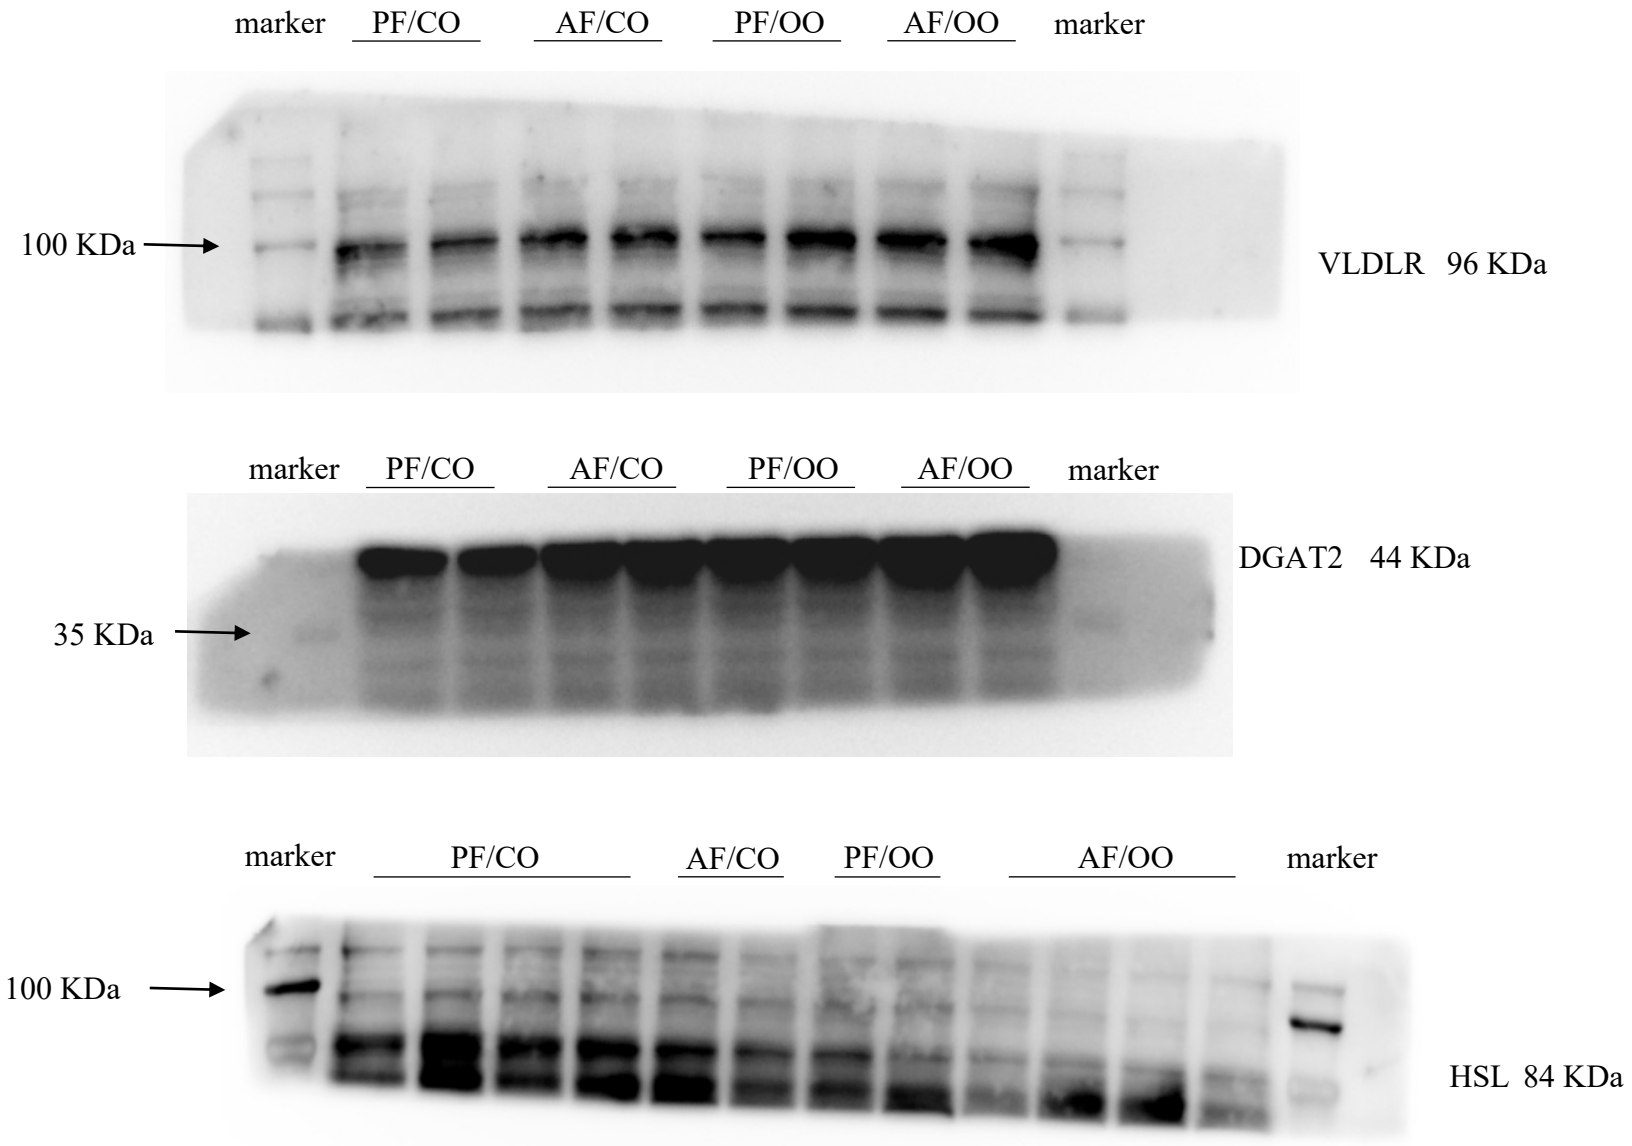

**Figure S3**

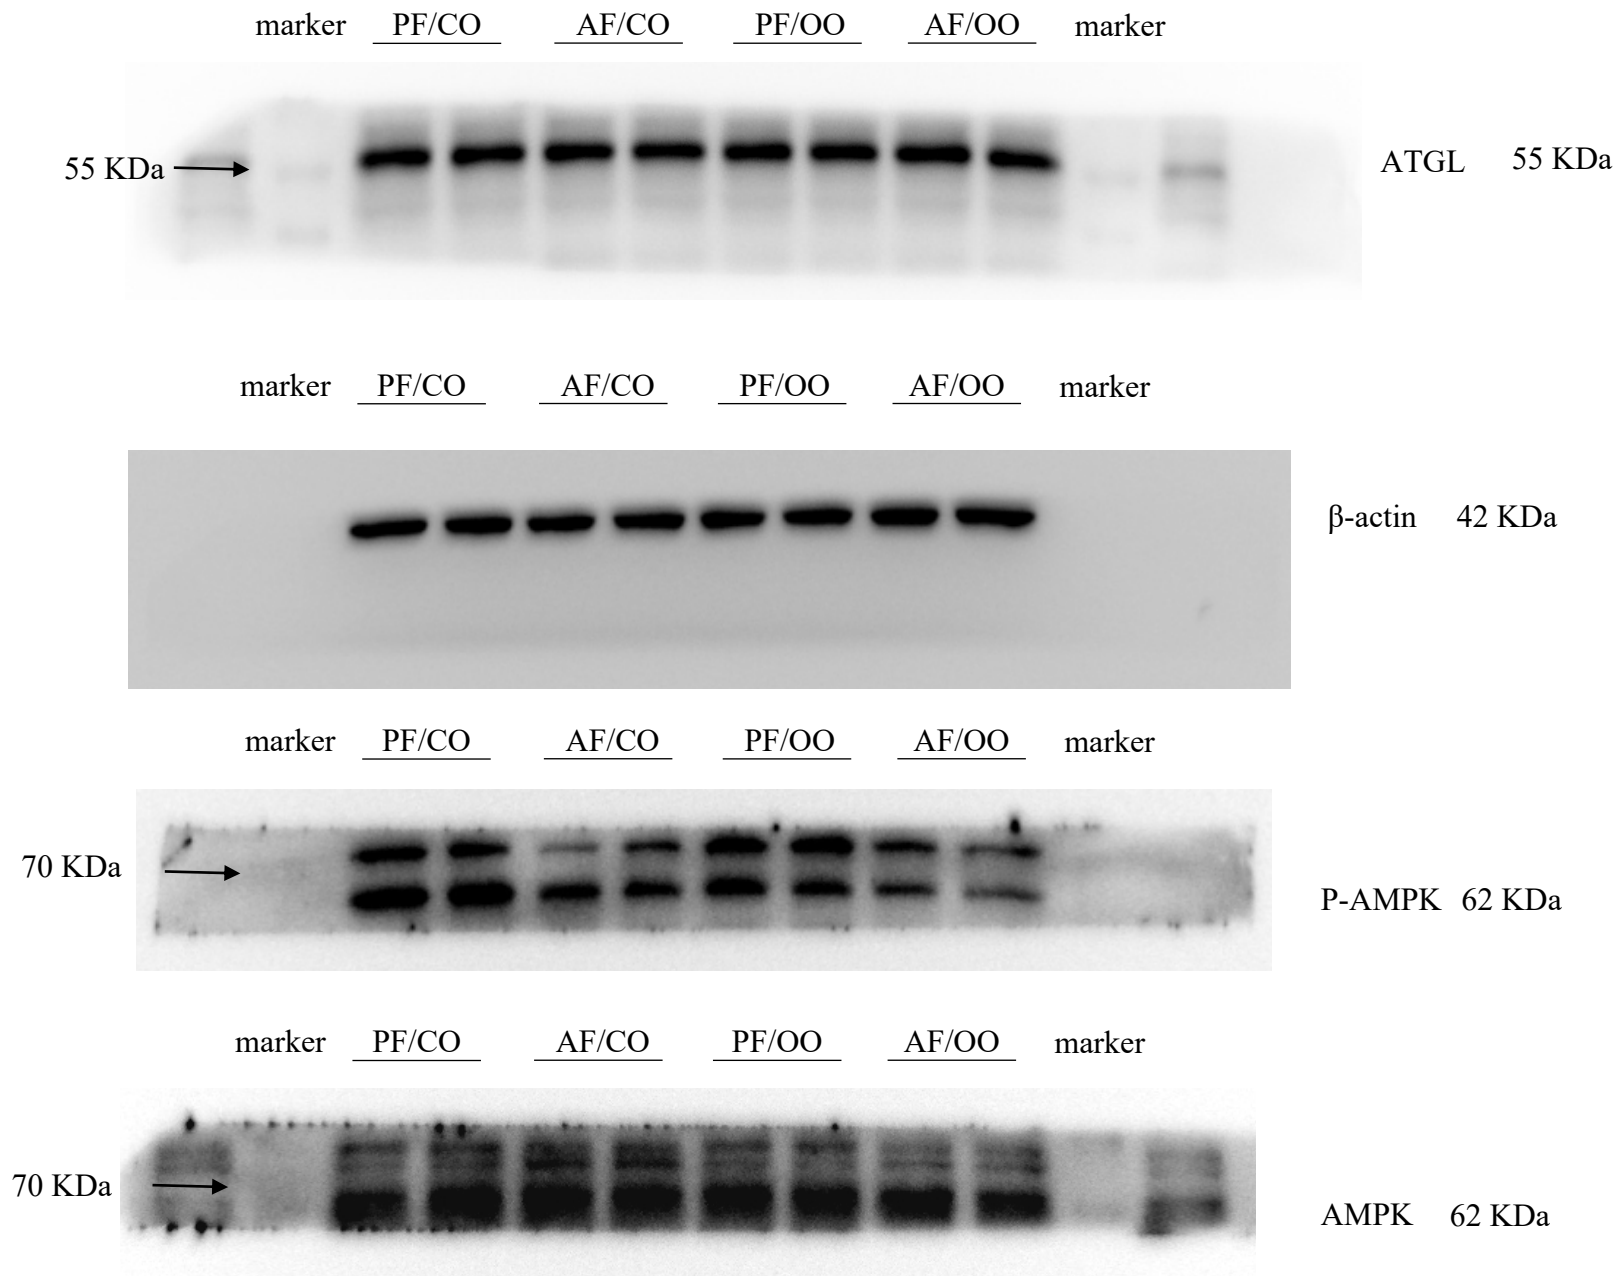

**Figure S3**

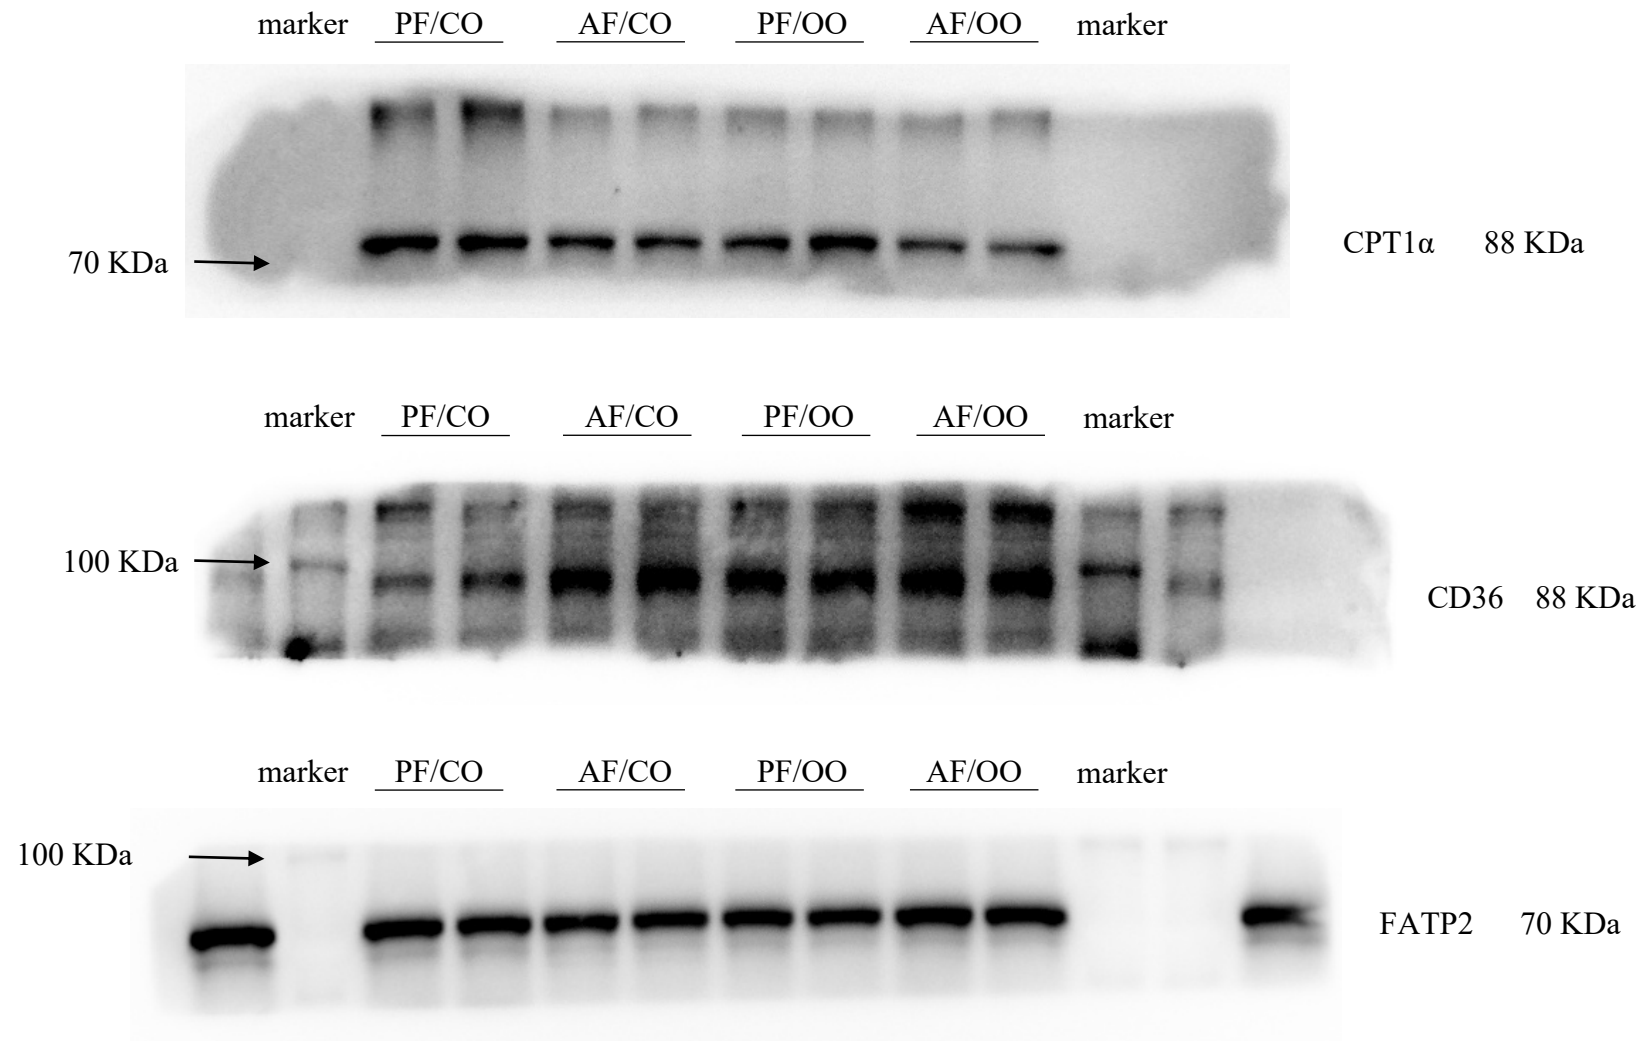

**Figure S3**

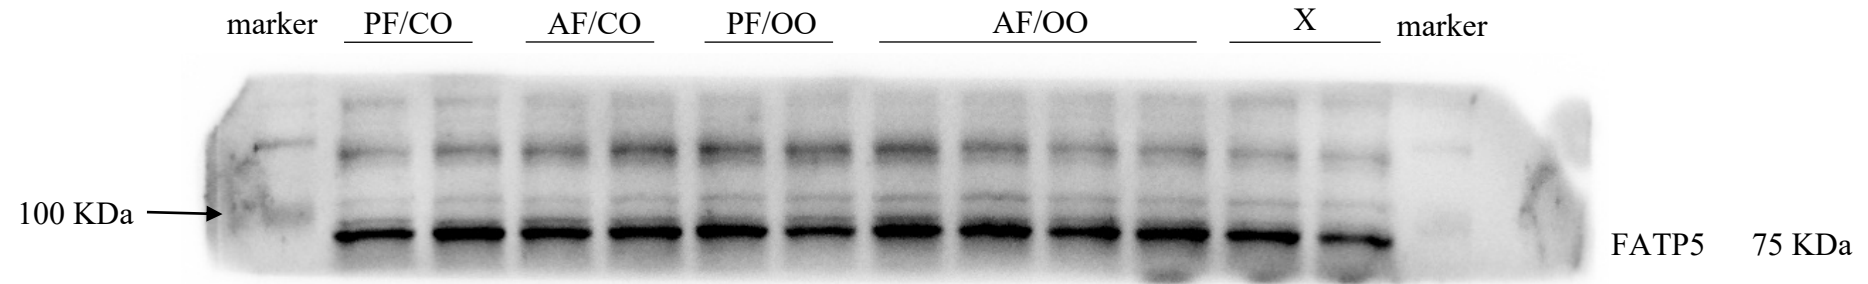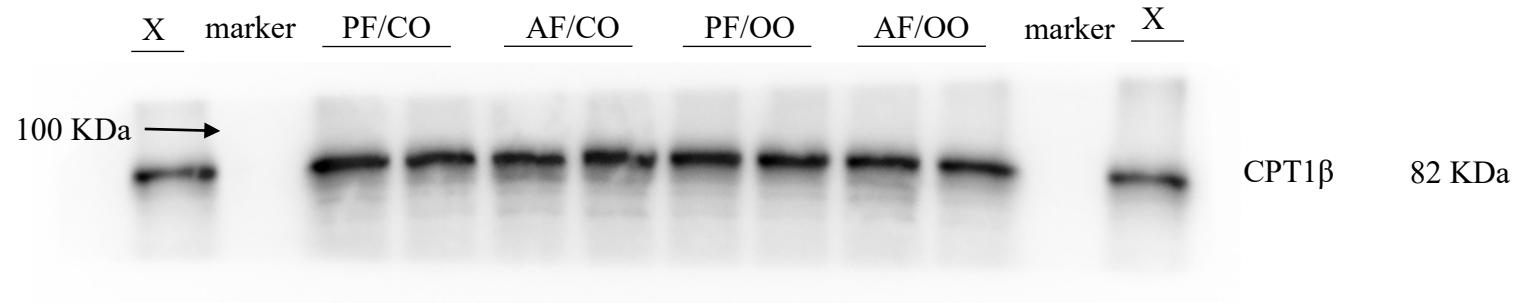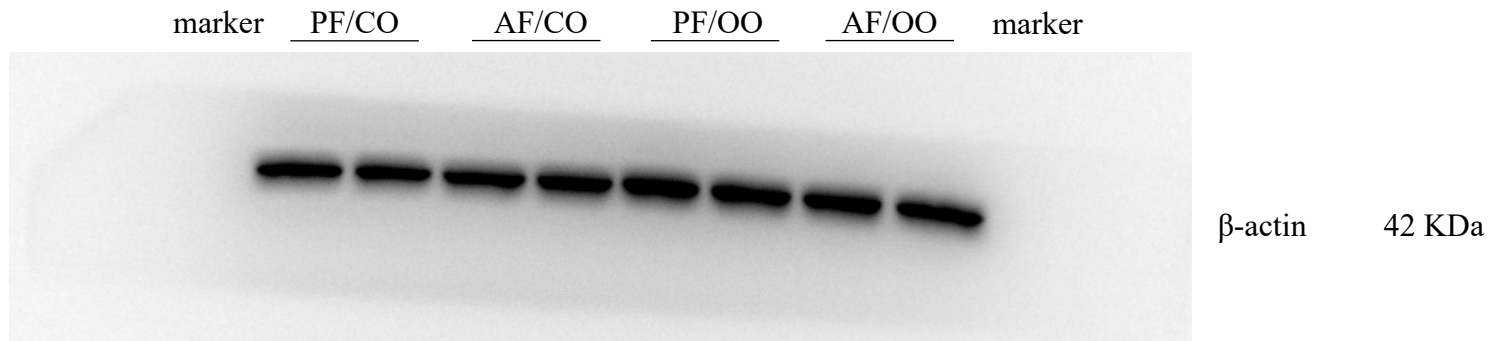

**Figure S3**

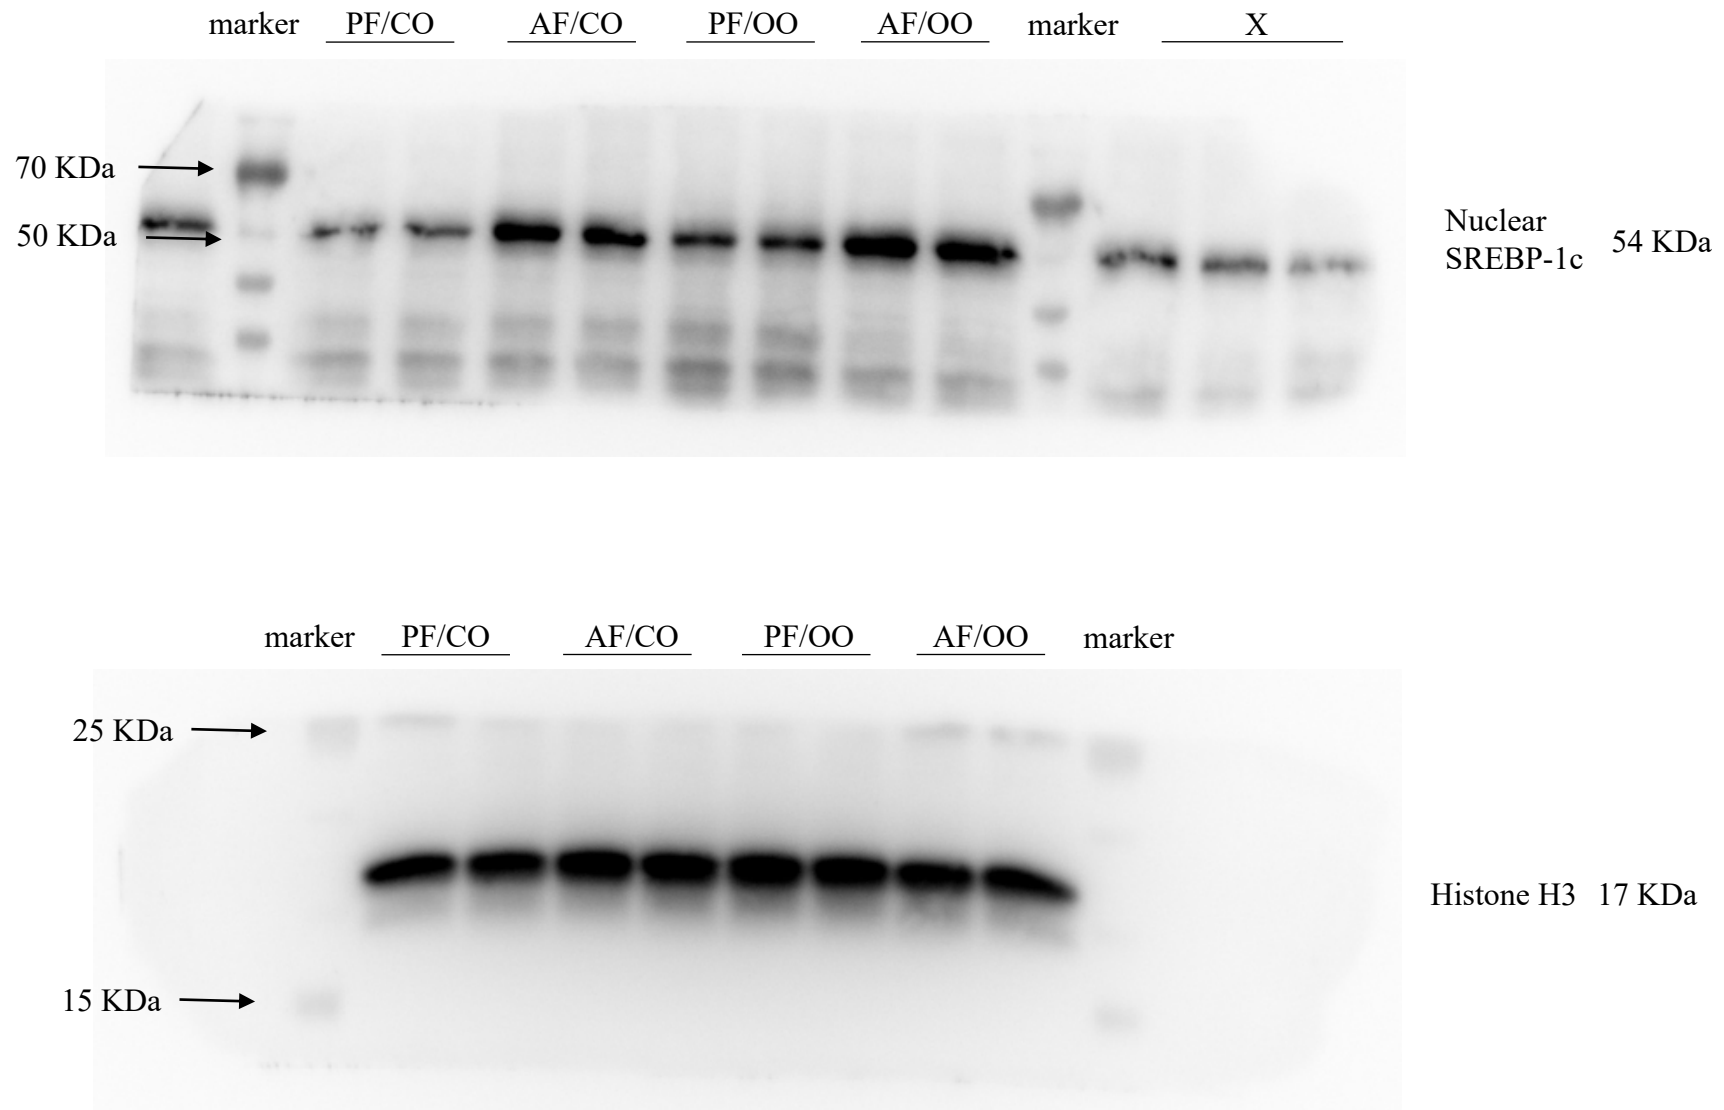

**Fig. S3 The original western blots.**
